# Supplementary material
Source: Springer Nature journal article supplement (https://www.springermedizin.de/resource/supplementary/12889_2005_452_MOESM2_ESM.pdf/9500900)

Figure 1 (continued).

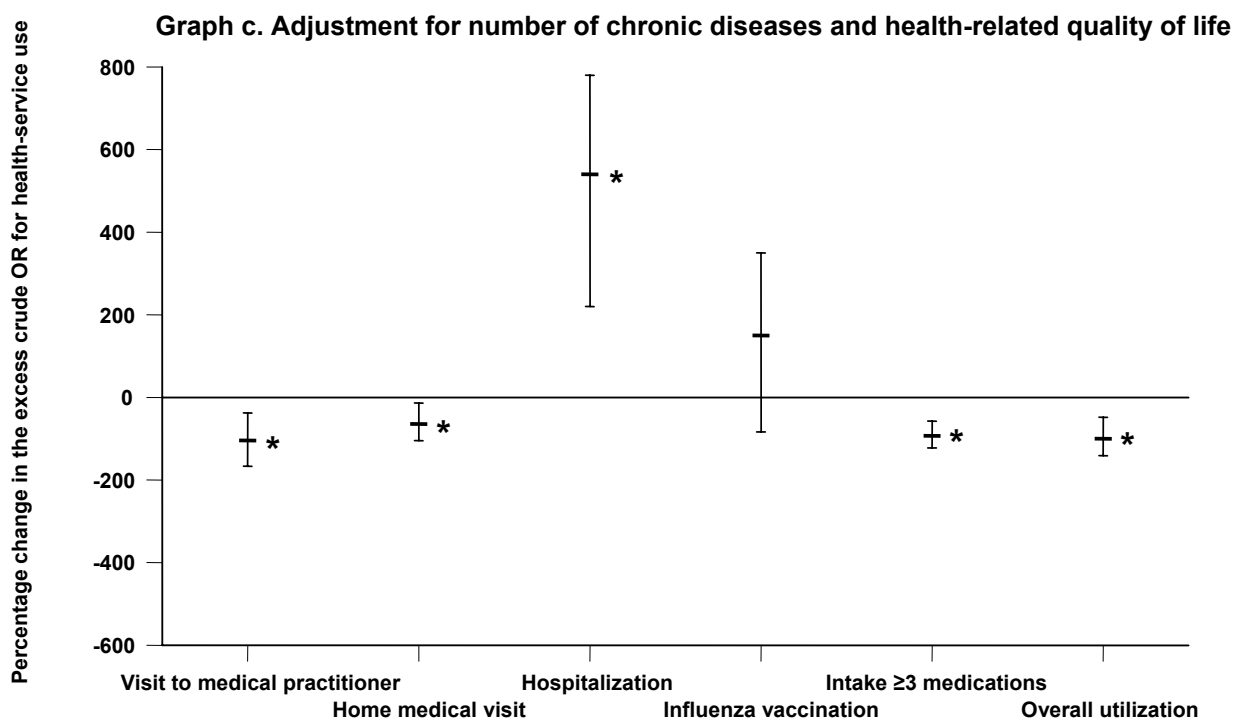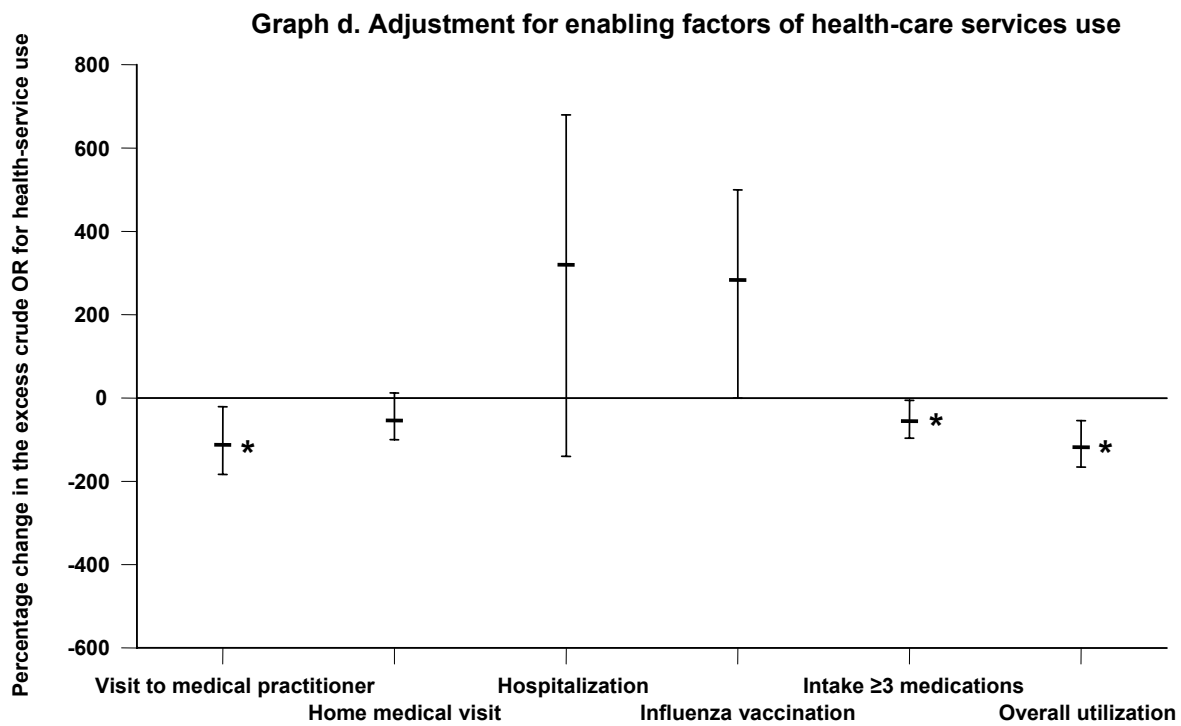

\* $p < 0.05$  for percentage change in the excess crude odds ratio.

Supplement: MOESM2 [file 9500900]
